# Supplementary material for: The non-covalent nature of the molecular structure of the benzene molecule
Source: Royal Society of Chemistry journal article supplement (doi:10.1039/c3cp55256j), 2014-01-01
Supplement: c3cp55256j1.pdf [file c3cp55256j1.pdf]

Electronic supplementary information

## The Non-Covalent Nature of the Molecular Structure of the Benzene Molecule

T.M. Cardozo,<sup>a</sup> F. Fantuzzi<sup>a</sup> and M. A. C. Nascimento<sup>a,\*</sup>

<sup>a</sup> Instituto de Química, Universidade Federal do Rio de Janeiro (UFRJ)  
Av. Athos da Silveira Ramos, 149, A412. Rio de Janeiro, Brazil.  
CEP: 21.941-909.

\* E-mail: chaer01@gmail.com.

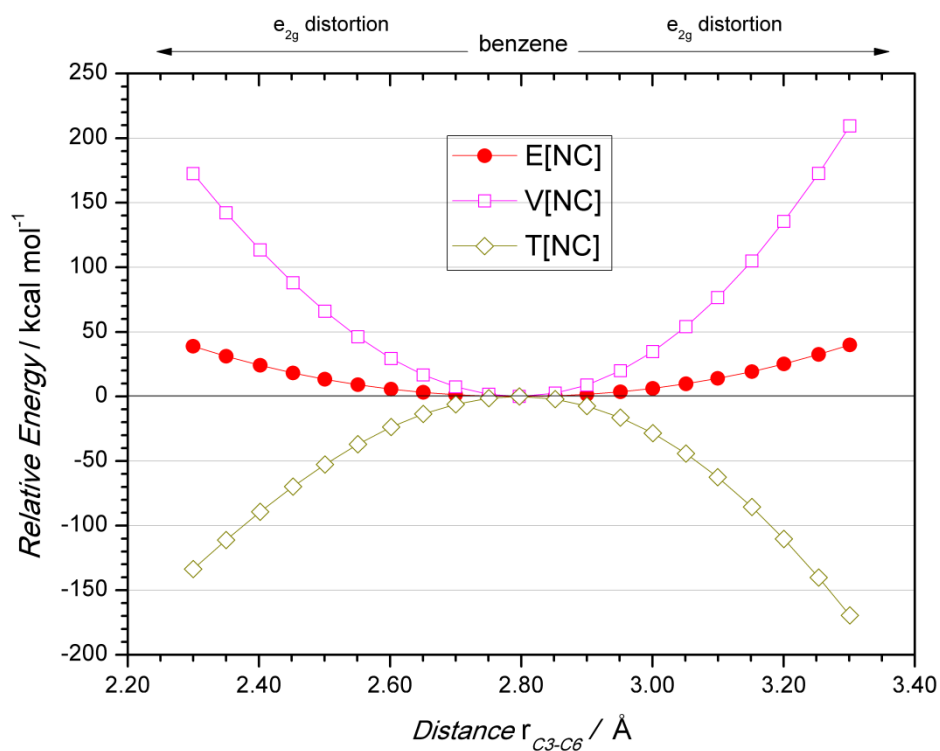

**Fig. S1** Non-covalent energy partition into kinetic,  $T[NC]$ , and potential,  $V[NC]$  contributions for the molecule along the  $e_{2g}$  vibration mode.

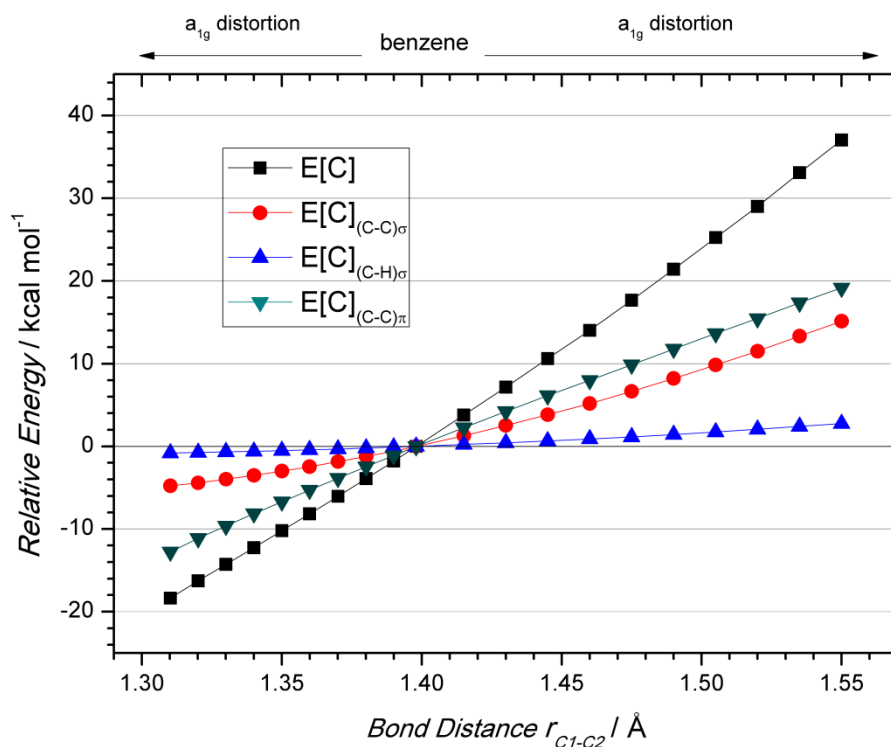

**Fig. S2** Covalent energy partition into C-H, (C-C) $\sigma$  and (C-C) $\pi$  contributions for the molecule along the  $a_{1g}$  vibration mode.

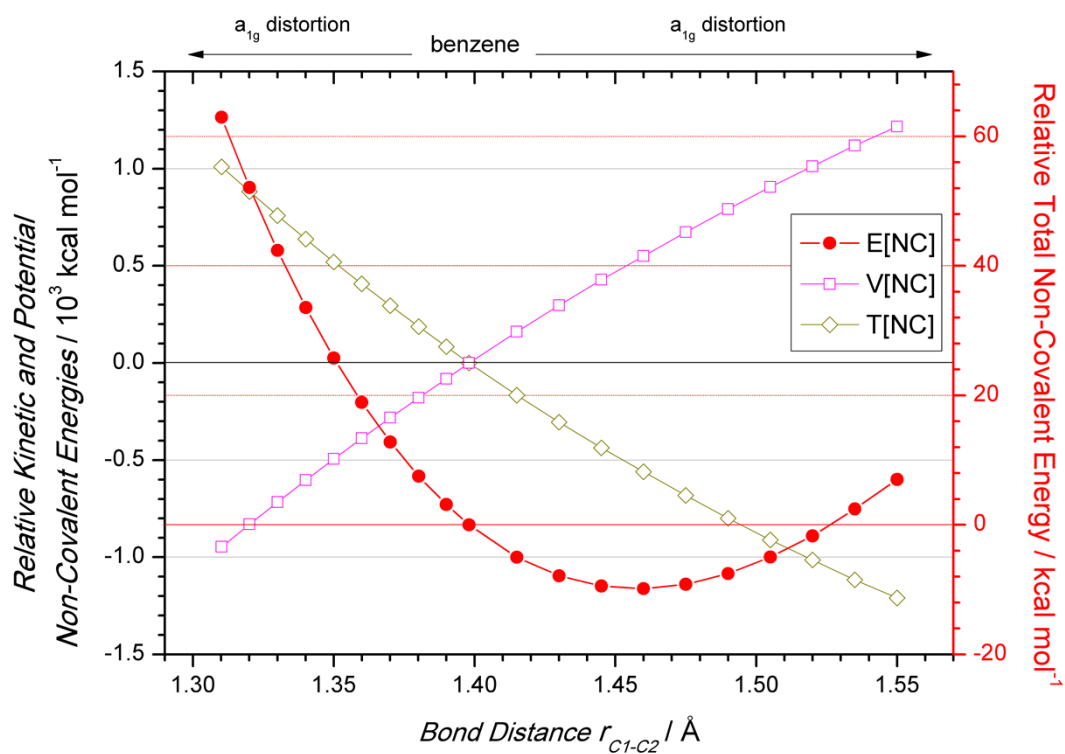

**Fig. S3** Non-covalent energy partition into kinetic,  $T[NC]$ , and potential,  $V[NC]$  contributions for the molecule along the  $a_{1g}$  vibration mode.
